# Supplementary material for: Priority effects, nutrition and milk glycan-metabolic potential drive Bifidobacterium longum subspecies dynamics in the infant gut microbiome
Source: PeerJ journal article supplement (doi:10.7717/peerj.18602), 2025-01-21
Supplement: Figure_S2.pdf [file Figure_S2.pdf]

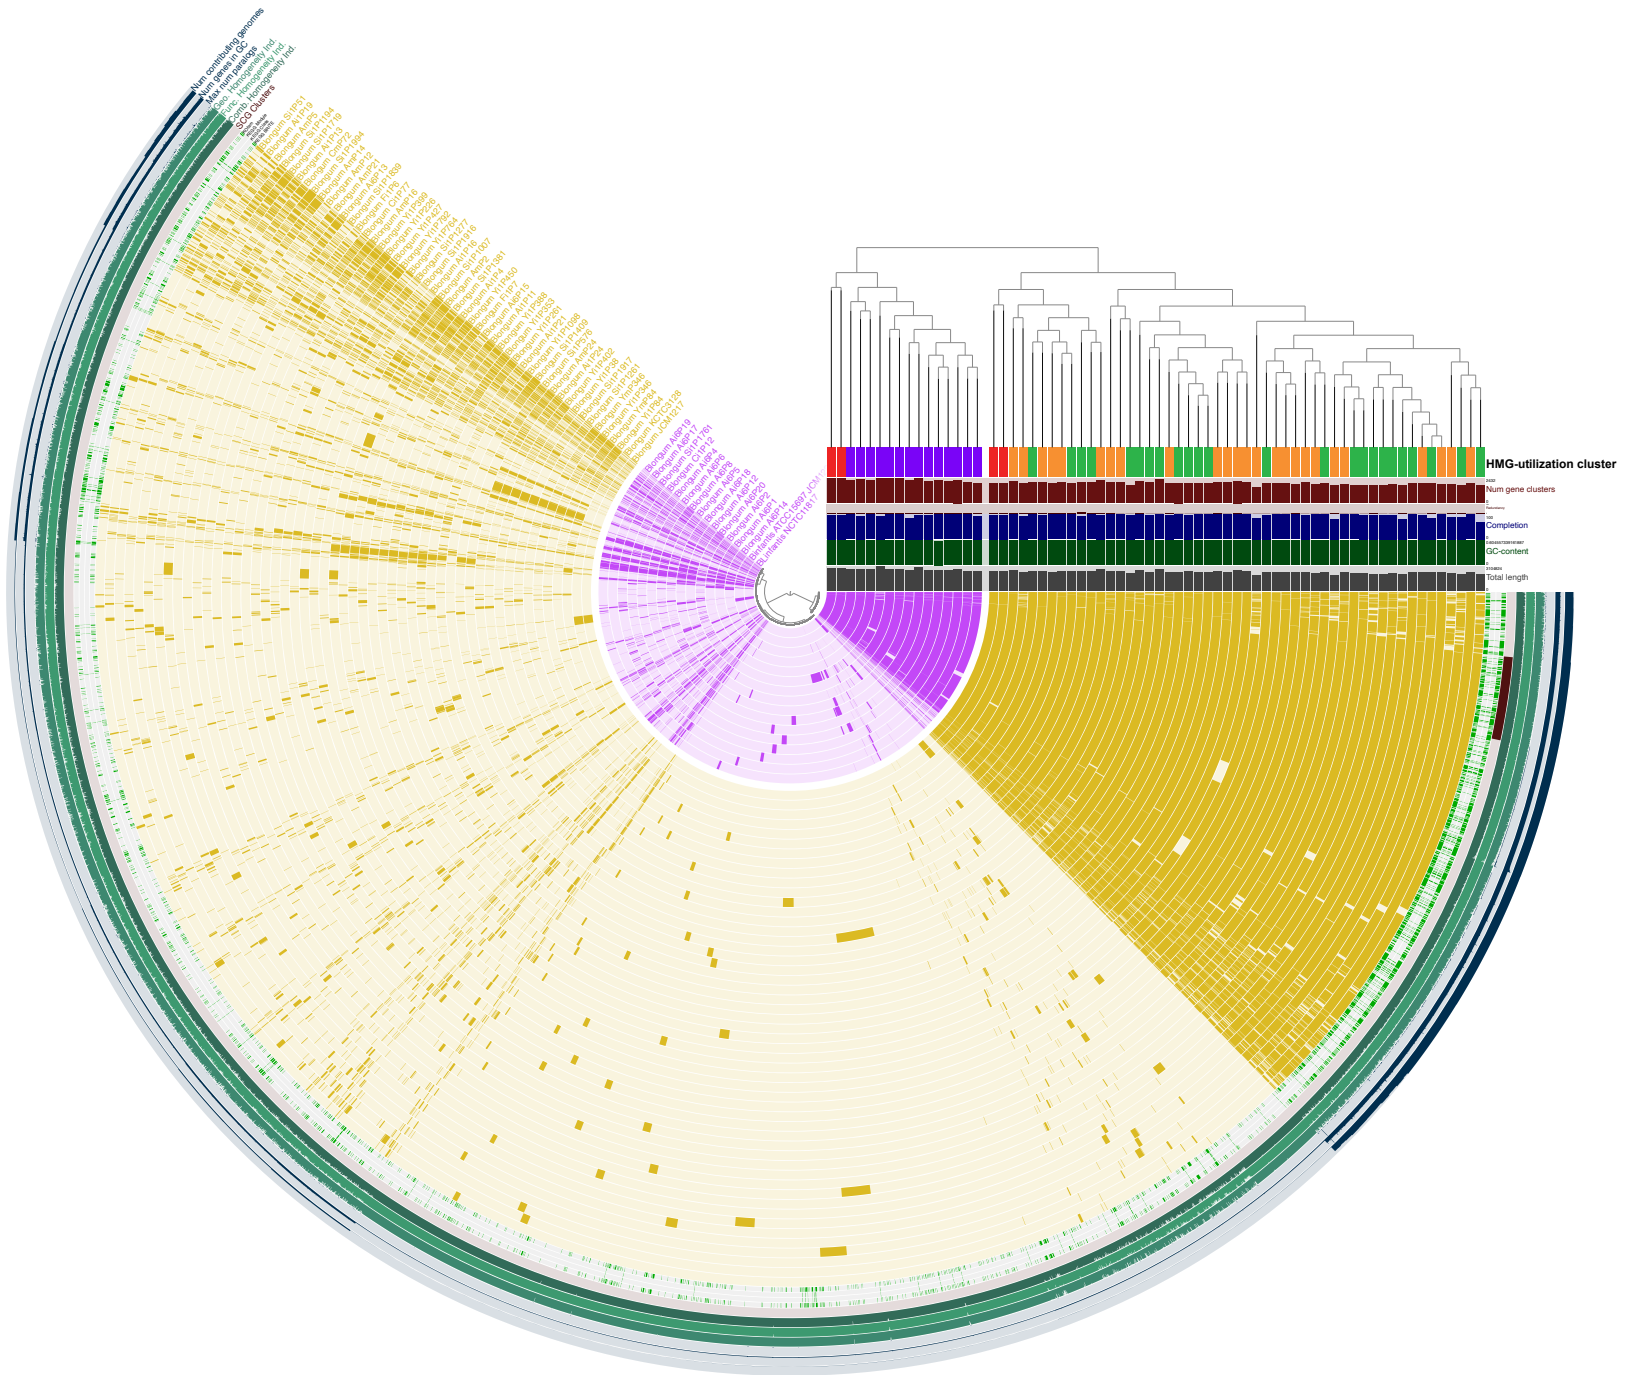

### HMG-utilization profile

■ reference\_genome (4)
 ■ BLongum-HMGsimple (24)
 ■ BLongum-HMGcomplex (25)
 ■ BLinfantis-HMG (14)
