# Supplementary material for: Priority effects, nutrition and milk glycan-metabolic potential drive Bifidobacterium longum subspecies dynamics in the infant gut microbiome
Source: PeerJ journal article supplement (doi:10.7717/peerj.18602), 2025-01-21
Supplement: Figure_S3.pdf [file Figure_S3.pdf]

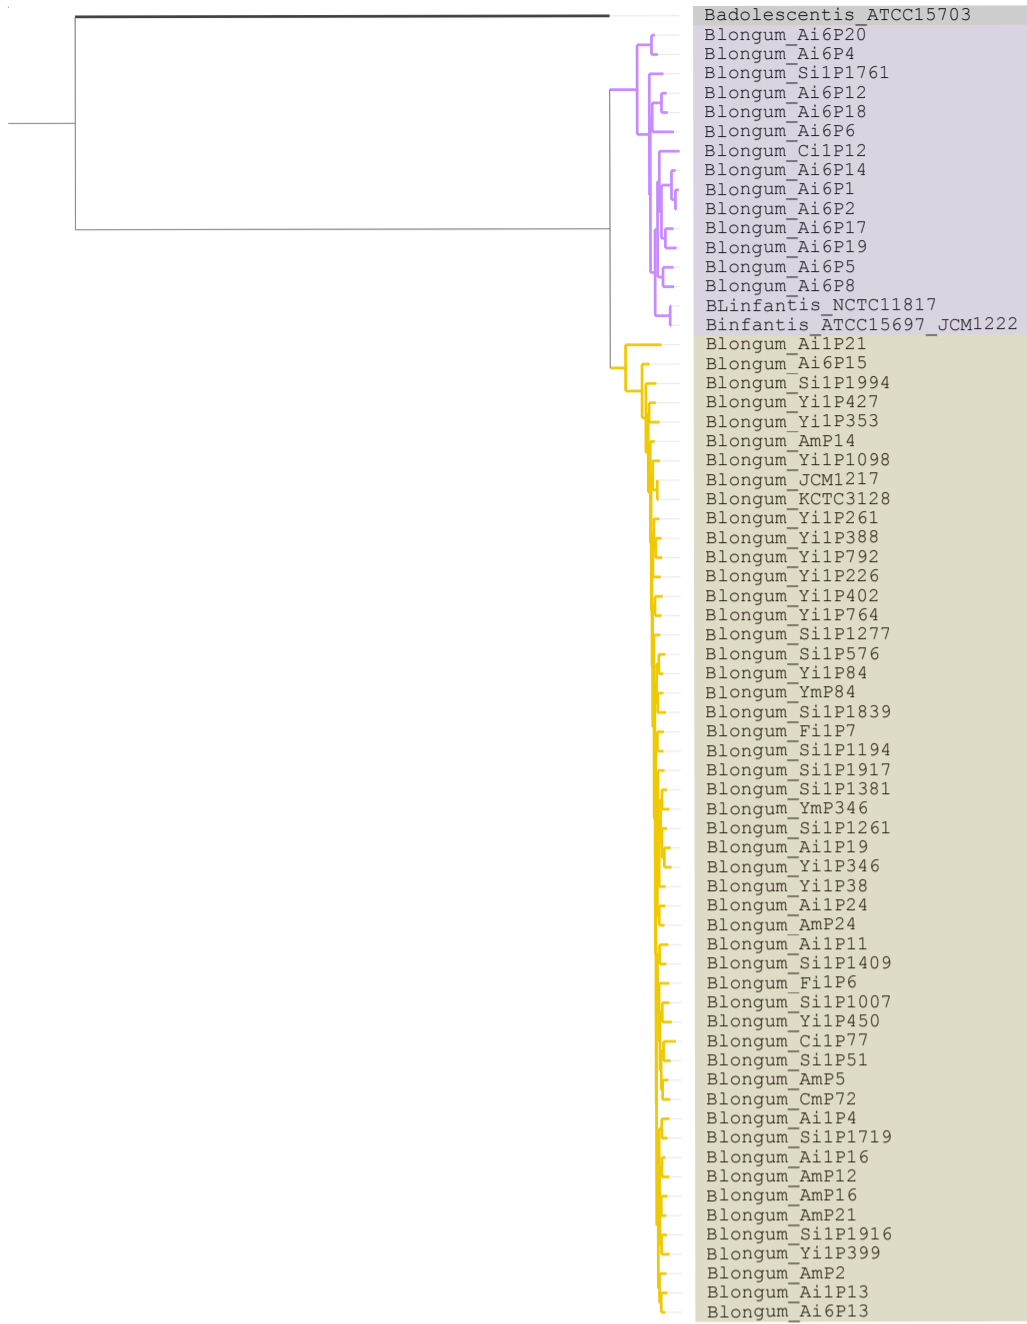

***Bifidobacterium adolescentis* (outer group)**

***Bifidobacterium longum* subsp. *infantis***

***Bifidobacterium longum* subsp. *longum***
