# Supplementary material for: Priority effects, nutrition and milk glycan-metabolic potential drive Bifidobacterium longum subspecies dynamics in the infant gut microbiome
Source: PeerJ journal article supplement (doi:10.7717/peerj.18602), 2025-01-21

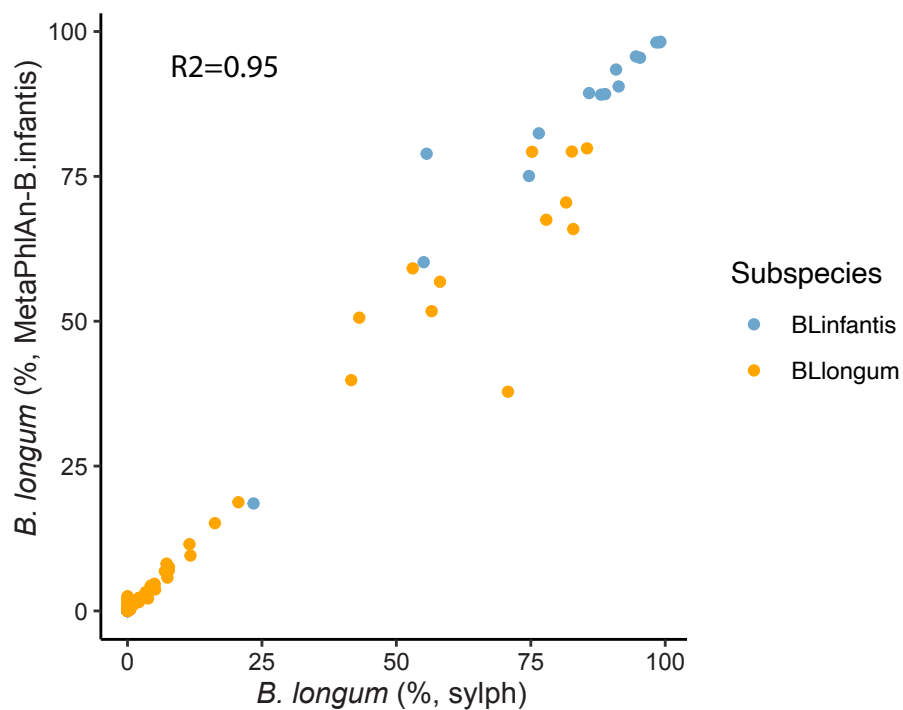

Supplement: Figure_S5.pdf [file Figure_S5.pdf]
