# Supplementary material for: Priority effects, nutrition and milk glycan-metabolic potential drive Bifidobacterium longum subspecies dynamics in the infant gut microbiome
Source: PeerJ. 2025 Jan 21;13:e18602. doi: 10.7717/peerj.18602 (PMC11758915; doi:10.7717/peerj.18602)
Supplement: Supplemental Information 4 — The heatmap shows the distribution of B. longum subspecies-specific marker genes (119 BLinfantis and 128 BLlongum; MetaPhlAn-B.infantis database) among 63 MAGs from AIMS and publicly available studies. Clustering of MAGs based on the copy-number of marker genes was used to differentiate BLlongum and BLinfantis MAGs and validate subspecies assignment achieved through our phylogenomics method. [file peerj-13-18602-s004.pdf]

Subspecies\_marker

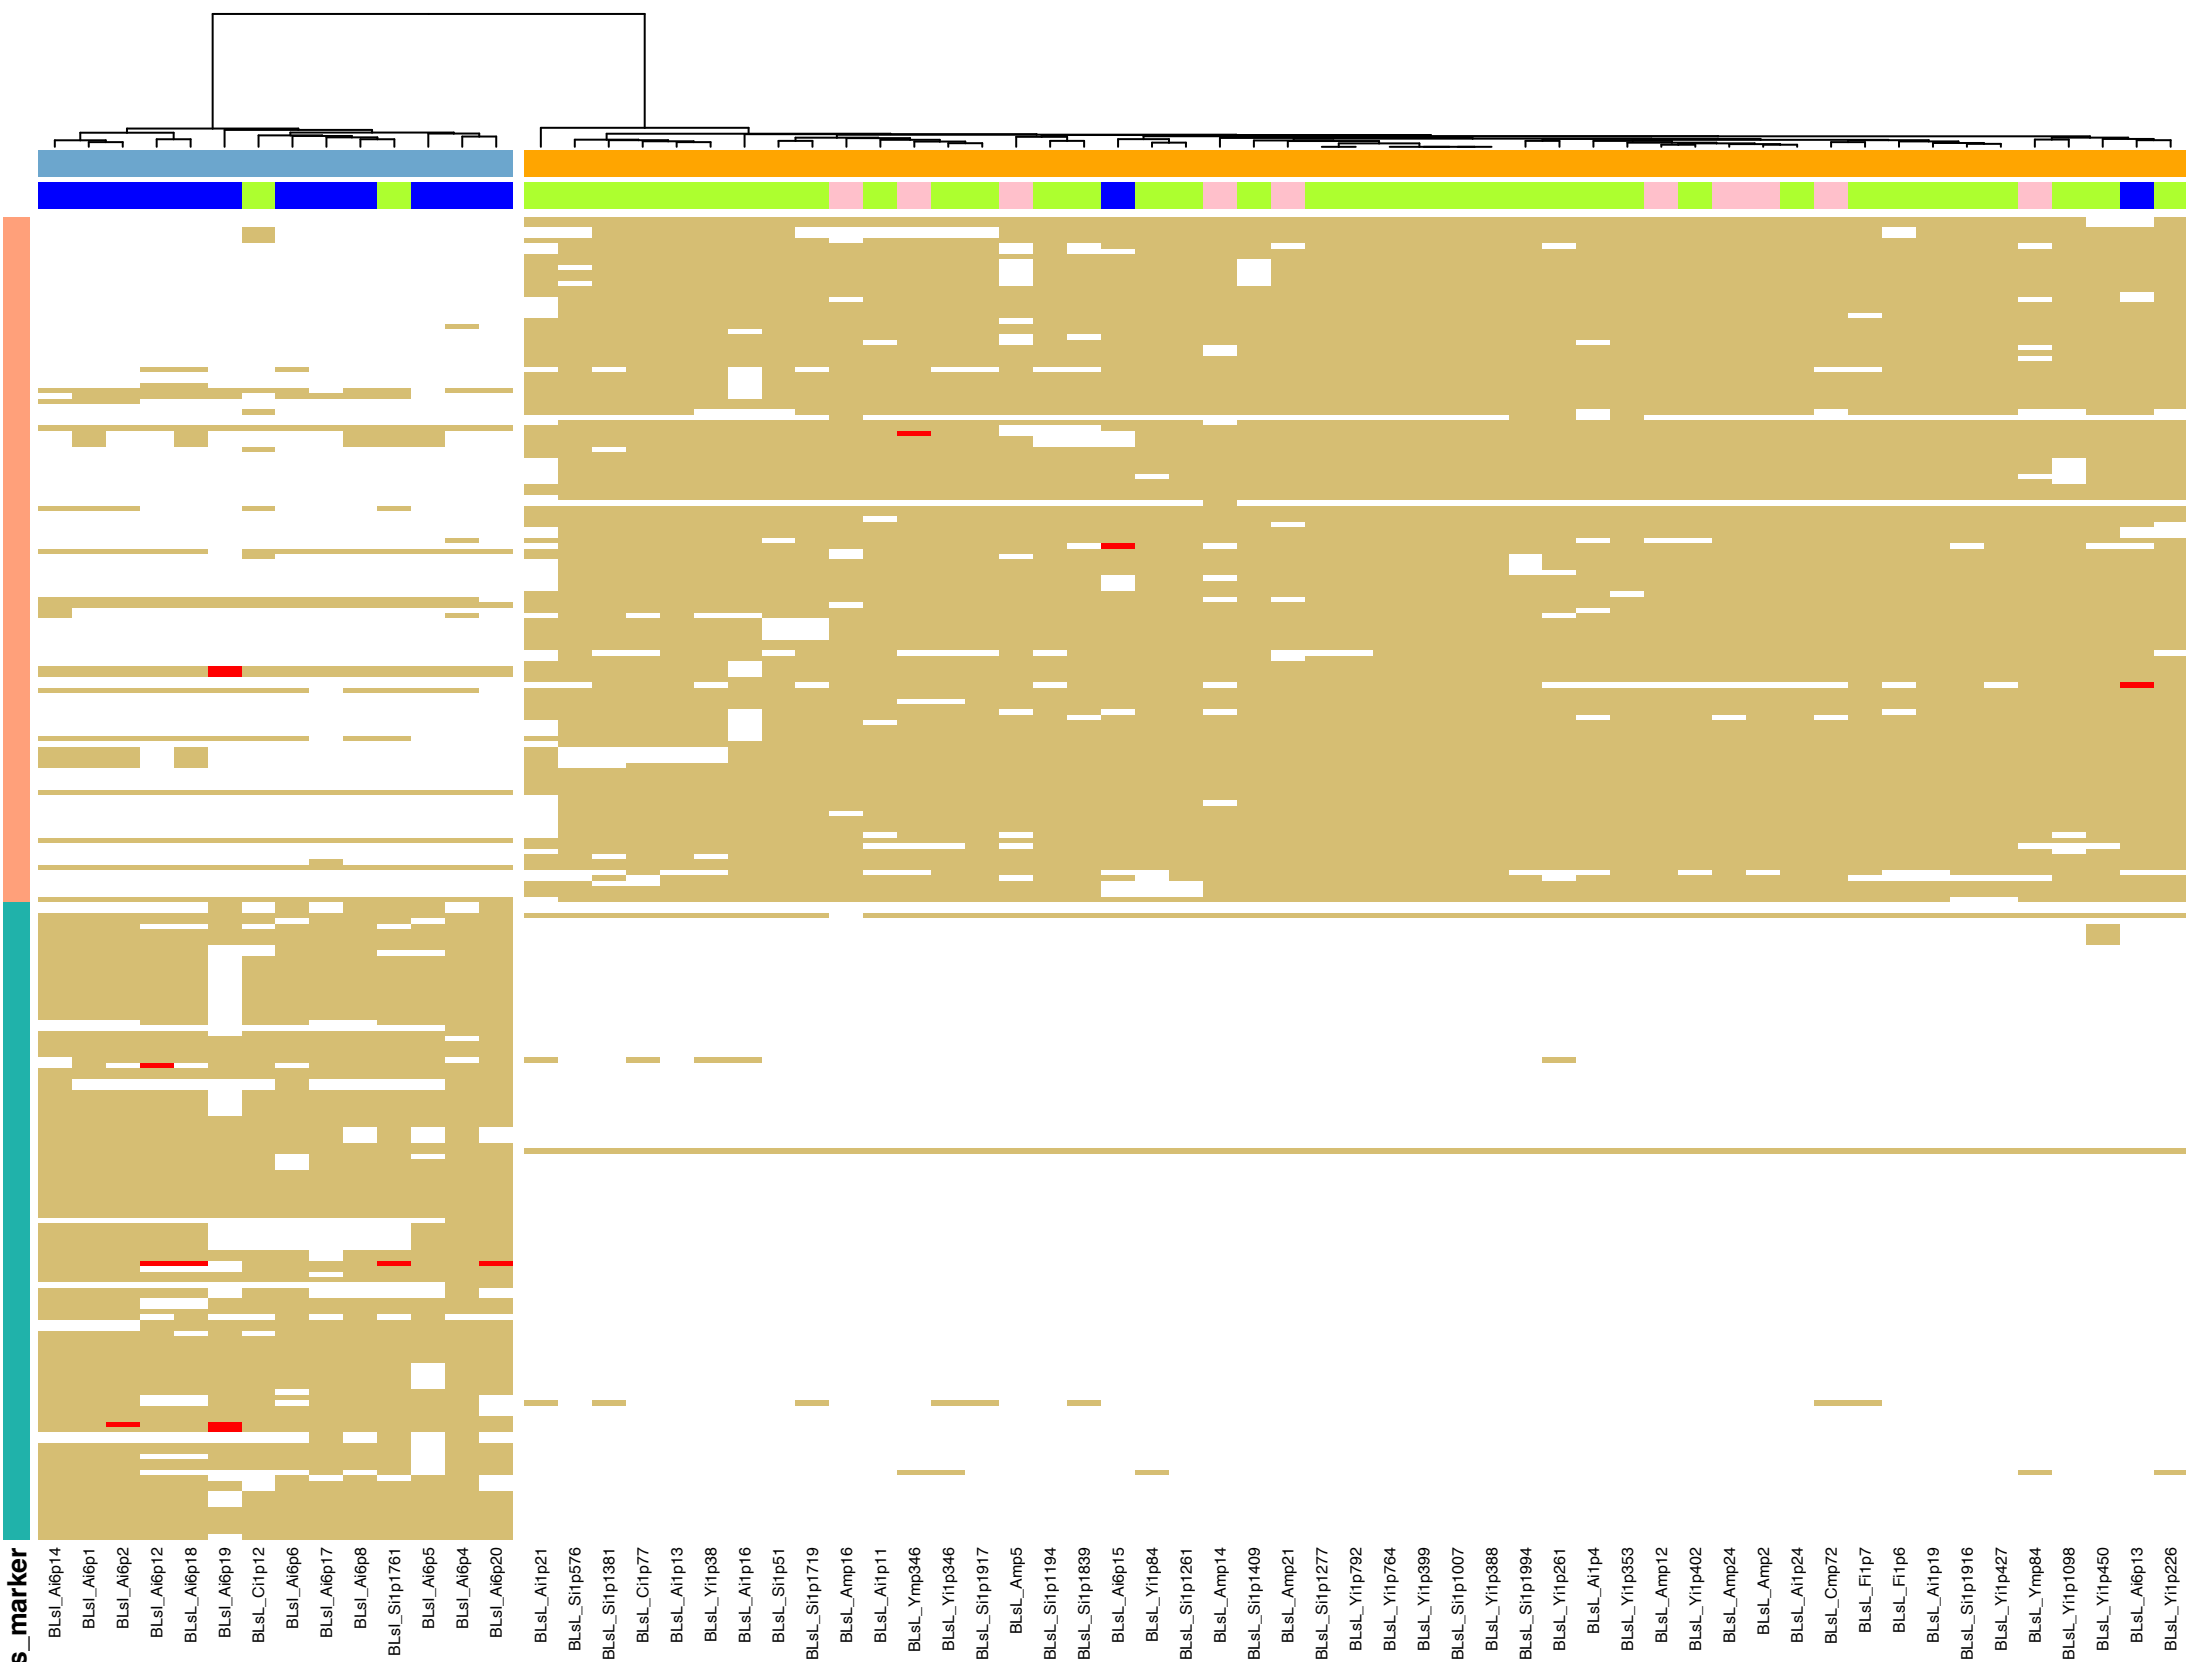

Subspecies\_MAGs  
Measurement

Subspecies\_MAGs

- BLinfantis
- BLlongum

Measurement

- infant\_1mnt
- infant\_6mnt
- Mother

Marker gene copy-number (#)

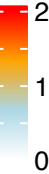

Subspecies\_marker

- BLinfantis
- BLlongum
